# Supplementary material
Source: MDPI journal article supplement (https://www.mdpi.com/1424-2818/15/5/587)
Supplement: s1 [file s1]

Supplementary data S1. Percentage of calcium and silicium released into solution, Percentage of glucose consumed and pH for all the experiments

| Species  |                                      | % Ca released in solution |                    | % Si released in solution |                    | % Glucose consumed |                    | pH    |                    |
|----------|--------------------------------------|---------------------------|--------------------|---------------------------|--------------------|--------------------|--------------------|-------|--------------------|
|          |                                      | Mean                      | Standard deviation | Mean                      | Standard deviation | Mean               | Standard deviation | Mean  | Standard deviation |
| Bacteria | <i>Burkholderia</i>                  | 1.6                       | 0.293              | 0.0056                    | 0.0021             | 93.8               | 0.280              | 7.720 | 0.061              |
|          | <i>Massilia sp.</i>                  | 1.4                       | 0.034              | 0.0053                    | 0.0008             | 91.5               | 0.875              | 7.923 | 0.446              |
|          | <i>Bacillus sp.</i>                  | 0.4                       | 0.027              | 0.0000                    | 0.0000             | 43.0               | 7.337              | 7.267 | 0.067              |
|          | <i>Bacillus licheniformis</i>        | 1.7                       | 0.194              | 0.0010                    | 0.0006             | 67.0               | 0.351              | 7.493 | 0.208              |
|          | <i>Bacillus simplex</i>              | 0.5                       | 0.084              | 0.0000                    | 0.0000             | 29.7               | 10.009             | 7.520 | 0.026              |
|          | <i>Microbacterium sp.</i>            | 1.1                       | 0.061              | 0.0055                    | 0.0016             | 94.0               | 0.550              | 7.923 | 0.197              |
|          | <i>Microbacterium phyllosphaerae</i> | 0.6                       | 0.243              | 0.0000                    | 0.0000             | 58.5               | 2.775              | 7.523 | 0.000              |
|          | <i>Stenotrophomonas sp.</i>          | 1.5                       | 0.016              | 0.0046                    | 0.0009             | 50.1               | 4.696              | 7.433 | 0.129              |
|          | <i>Stenotrophomonas maltophilia</i>  | 0.6                       | 0.121              | 0.0121                    | 0.0029             | 39.5               | 1.025              | 7.660 | 0.315              |
|          | <i>Pseudomonas gessardii</i>         | 1.6                       | 0.035              | 0.0126                    | 0.0013             | 93.9               | 0.280              | 7.667 | 0.237              |
|          | <i>Pantoea agglomerans</i>           | 1.5                       | 0.029              | 0.0016                    | 0.0005             | 66.8               | 0.202              | 7.483 | 0.023              |
|          | <i>Enterobacter sp.</i>              | 0.6                       | 0.017              | 0.0002                    | 0.0003             | 18.0               | 6.101              | 8.087 | 0.042              |
|          | <i>Clavibacter michiganensis</i>     | 0.7                       | 0.053              | 0.0016                    | 0.0006             | 16.3               | 3.948              | 7.720 | 0.046              |
|          | <i>Streptomyces sp.</i>              | 0.4                       | 0.051              | 0.0010                    | 0.0017             | 4.0                | 12.371             | 7.603 | 0.065              |
|          | <i>Rhodococcus sp.</i>               | 0.3                       | 0.034              | 0.0018                    | 0.0007             | 12.2               | 12.651             | 7.557 | 0.176              |
|          | <i>Pedobacter sp.</i>                | 2.3                       | 0.074              | 0.0000                    | 0.0000             | 79.0               | 1.087              | 7.770 | 0.020              |
| Fungi    | <i>Mucor circinelloides</i>          | 2.41                      | 0.57               | 0.030                     | 0.001              | 56.63              | 2.71               | 8.04  | 0.10               |
|          | <i>Aureobasidium sp.</i>             | 2.59                      | 0.72               | 0.045                     | 0.012              | 68.69              | 5.21               | 7.80  | 0.16               |
|          | <i>Trichoderma sp.</i>               | 4.70                      | 1.36               | 0.023                     | 0.001              | 95.69              | 4.54               | 6.00  | 1.10               |
|          | <i>Penicillium glandicola</i>        | 0.92                      | 0.13               | 0.043                     | 0.001              | 77.02              | 5.13               | 7.21  | 0.26               |
|          | <i>Aureobasidium pulullans</i>       | 6.54                      | 0.64               | 0.050                     | 0.001              | 100.27             | 0.03               | 7.83  | 0.13               |

|  |                                    |      |      |       |       |       |       |      |      |
|--|------------------------------------|------|------|-------|-------|-------|-------|------|------|
|  | <i>Cladosporium sp.</i>            | 1.72 | 0.45 | 0.026 | 0.002 | 86.71 | 7.72  | 7.82 | 0.10 |
|  | <i>Neocucurbitaria irregularis</i> | 2.19 | 0.42 | 0.050 | 0.003 | 71.32 | 11.96 | 7.04 | 0.88 |
|  | <i>Stachybotrys chratrum</i>       | 3.06 | 1.35 | 0.055 | 0.002 | 69.63 | 14.02 | 7.10 | 1.02 |
|  | <i>Penicillium speluncae</i>       | 1.67 | 0.20 | 0.058 | 0.002 | 46.99 | 4.80  | 7.57 | 0.07 |
|  | <i>Beauveria bassiana</i>          | 1.58 | 0.11 | 0.061 | 0.003 | 40.11 | 6.29  | 7.73 | 0.14 |
|  | <i>Aspergillus tubingensis</i>     | 0.63 | 0.30 | 0.070 | 0.005 | 68.45 | 14.43 | 3.15 | 0.22 |
|  | Blank                              | 0.40 | 0.15 | 0.03  | 0.02  | 0.00  | 1.46  | 7.89 | 0.12 |

Supplementary data S2. Low molecular mass organic acids concentrations (mg/l) in limestone biodissolution by bacterial strains. “-“ means below detection limits.

[illegible]

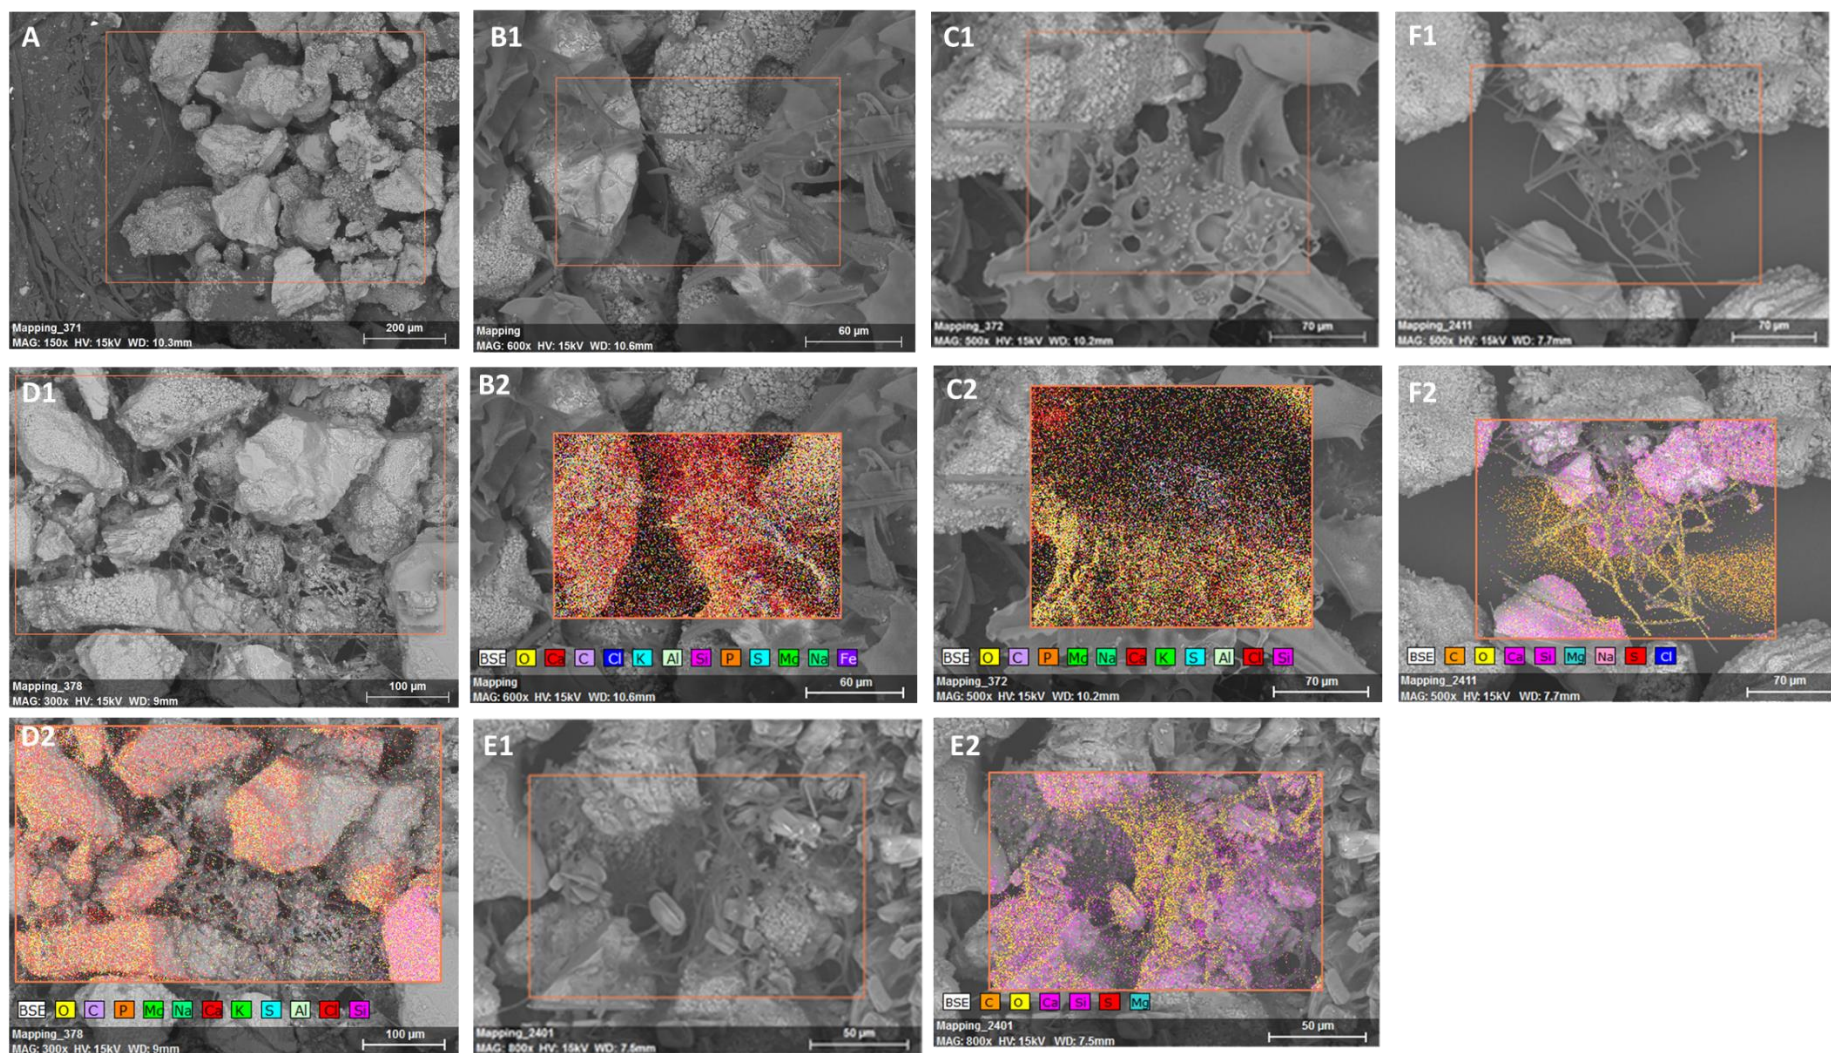

Supplementary data S3. Scanning electron micrographs of initial (non-contacted) limestone grains (A) and after 7 days in the bioleaching medium with *Rhodococcus* sp. (B), *Stenotrophomonas* sp. (C) *Pedobacter* sp. (D), *Penicillium glandicola* (E) and *Aureobasidium* sp. (F)
